# Supplementary material for: Pollen Morphology in Sorbus L. (Rosaceae) and Its Taxonomic Implications
Source: MDPI journal article supplement (doi:10.3390/plants12183318), 2023-09-20
Supplement: s1 [file s1]

**Table S2.** Voucher information of genus *Sorbus* species examined in this study.

| Species Name                                             | Place of Collection                                     | Collector         | Vouchers   | Herbarium Information |
|----------------------------------------------------------|---------------------------------------------------------|-------------------|------------|-----------------------|
| <i>Sorbus albovii</i> Zinserl.                           | Russian Federation: Sakhalin, Northwest Sakhalin Island | T Zaikonnikova    | s.n.       | MO                    |
| <i>Sorbus alnifolia</i> (Siebold & Zucc.) C. Koch        | South Korea: Jeollanam-do, Taehuksan Island             | M Li              | AA74-90    | NF                    |
| <i>Sorbus americana</i> Marsh                            | Canada: New Brunswick, Charlotte                        | M Li              | AA1845-66  | NF                    |
| <i>Sorbus amurensis</i> Koehne                           | Russia: Khabarovskiy, Nanayskiy                         | Anonymous         | s.n.       | MO                    |
| <i>Sorbus aria</i> (L.) Crantz                           | France: Grand Est, Haut-Rhin                            | M Li              | AA115-2005 | NF                    |
| <i>Sorbus aucuparia</i> L.                               | Sweden; Gotland, Hejdeby                                | M Li              | AA1257-84  | NF                    |
| <i>Sorbus boissieri</i> C. K. Schneid.                   | Georgia: Abkhazia, Anchkho Pass                         | D McNeal          | 220        | MO                    |
| <i>Sorbus buschiana</i> Zinserl.                         | Georgia: South Ossetia, Dzghara district                | T Zaikonnikova    | 5921A      | MO                    |
| <i>Sorbus buschiana</i> Zinserl.                         | United States: California, Butte                        | L Ahart           | 6323       | MO                    |
| <i>Sorbus caloneura</i> (Stapf) Rehder                   | China: Hubei, Shennongjia                               | E H Wilson        | 3494       | MO                    |
| <i>Sorbus caucasigena</i> Kom. ex Gatsch.                | Georgia: Ajara, Keda                                    | R Gagnidze et al. | 809        | MO                    |
| <i>Sorbus chamaemespilus</i> (L.) Crantz                 | France: Alpes Cote d'Azur, Alpes-de-Haute               | Anonymous         | 3270       | MO                    |
| <i>Sorbus commixta</i> Hedl.                             | Japan: Kagoshima, Yakushima                             | M Li              | AA1651-8   | NF                    |
| <i>Sorbus corymbifera</i> (Miq.) T. H. Nguyen & Yakovlev | Thailand: Nakhon Si Thammarat, Na Bon                   | XM Zhou           | s.n.       | MO                    |
| <i>Sorbus decora</i> (Sarg.) C. K. Schneid.              | USA: Maine, Aroostoo                                    | ML Ferrcal        | 2305       | GH00747045            |
| <i>Sorbus devoniensis</i> E. F. Warb.                    | Netherlands: Gelderland, Wageningen                     | M Li              | AA42-96    | NF                    |
| <i>Sorbus discolor</i> Maxim.                            | China: Henan, Luoning                                   | M Li              | H928       | MO                    |
| <i>Sorbus domestica</i> L.                               | Czech Republic: Central Bohemian Region, Prague         | M Li              | AA385-25   | NF                    |
| <i>Sorbus dunnii</i> Rehder                              | China: Fujian, Wuyishan                                 | M Li              | 674        | MO                    |
| <i>Sorbus esserteauiana</i> Koehne                       | China: Sichuan, Dujiangyang                             | M Li              | AA179-92   | NF                    |
| <i>Sorbus folgneri</i> (C. K. Schneid.) Rehder           | China: Sichuan, E'mei                                   | CH Li             | 101        | MO                    |
| <i>Sorbus foliolosa</i> (Wall.) Spach                    | China: Xizang, Bomi                                     | FG Shem           | 13203      | MO                    |
| <i>Sorbus gracilis</i> (Siebold & Zucc.) K. Koch         | Japan: Gunma, Momono-mura                               | O Ohba            | 71044      | MO                    |
| <i>Sorbus graeca</i> (Spach) Kotschy                     | Georgia: Kartli, Tbilisi                                | CG Alm et al.     | 2294       | MO                    |
| <i>Sorbus harrowiana</i> (Balf. fil. & W. W. Sm.) Rehder | China: Yunnan, Gongshan                                 | M Li              | GYD0144    | MO                    |
| <i>Sorbus helenae</i> Koehne                             | China: Sichuan, E'mei                                   | HG Xu             | s.n.       | CDBI                  |
| <i>Sorbus hemsleyi</i> (C. K. Schneid.) Rehder           | China: Hubei, Shennongjia                               | M Li              | AA1981-80  | NF                    |
| <i>Sorbus hupehensis</i> C. K. Schneid.                  | China: Hubei, Shennongjia                               | M Li              | AA1675-80  | NF                    |
| <i>Sorbus hybrida</i> (L.) L.                            | Sweden: Gotland, Visby                                  | M Li              | AA430-93   | NF                    |
| <i>Sorbus insignis</i> (Hook. fil.) Hedl.                | China: Xizang, Motuo                                    | B Xu et al.       | YLZB4493   | CDBI                  |
| <i>Sorbus intermedia</i> (Ehrh.) Pers.                   | Sweden: Smaland, Alghult                                | M Li              | AA476-85   | NF                    |

|                                                           |                                                            |                |           |      |
|-----------------------------------------------------------|------------------------------------------------------------|----------------|-----------|------|
| <i>Sorbus japonica</i> (Maxim.) Koehne                    | Japan: Kochi, Ochi-cho                                     | T Takahashi    | 317       | MO   |
| <i>Sorbus keissleri</i> (C. K. Schneid.)<br>Rehder        | China: Sichuan, Luding                                     | M Li           | WH76      | CDBI |
| <i>Sorbus koehneana</i> C. K. Schneid.                    | China: Sichuan, Luding                                     | GH Wang        | 91020     | MO   |
| <i>Sorbus kurzii</i> (Watt ex Prain) C. K.<br>Schneid.    | China: Yunnan, Tengchong                                   | LZ Hevy        | 11868     | MO   |
| <i>Sorbus latifolia</i> (Lam.) Pers.                      | Spain: Vizcaya, Amorebieta                                 | M Li           | AA18462   | NF   |
| <i>Sorbus matsumurana</i> (Makino)<br>Koehne              | Japan: Hokkaido, Kamikawa                                  | T Kawahara     | 691       | MO   |
| <i>Sorbus monbeigii</i> (Cardot) N. P.<br>Balakr.         | China: Yunnan, Deqin                                       | M Li           | 145       | CDBI |
| <i>Sorbus mougeotii</i> Godr. & Soy.-Will.                | Sweden: Skane, Brantevik                                   | M Li           | AA559-48  | NF   |
| <i>Sorbus persica</i> Hedl.                               | Uzbekistan: Tashkent, Gazalkent                            | Anonymous      | 4461      | MO   |
| <i>Sorbus pohuashanensis</i> (Hance)<br>Hedl.             | China: Heilongjiang, Fusong                                | M Li           | AA1175-80 | NF   |
| <i>Sorbus prattii</i> Koehne                              | China: Sichuan, Kangding                                   | M Li           | LMJXZC056 | CDBI |
| <i>Sorbus rehderiana</i> Koehne                           | China: Sichuan, Dujiangyang                                | M Li           | AA443-95  | NF   |
| <i>Sorbus rufo-ferruginea</i> C. K.<br>Schneid.           | Japan: Hondo, Lake Yumato                                  | M Li           | AA364-80  | NF   |
| <i>Sorbus sambucifolia</i> (Cham. &<br>Schltdl.) M. Roem. | Japan: Yamagata, Asahi-machi                               | Anonymous      | 7003      | MO   |
| <i>Sorbus sargentiana</i> Koehne                          | China: Sichuan, Baoxing                                    | M Li           | 192       | CDBI |
| <i>Sorbus scopulina</i> Greene                            | United States: Idaho, Bonner                               | M Li           | AA310-75  | NF   |
| <i>Sorbus sibirica</i> Hedl.                              | Russian Federation: Sakhalin, Northwest<br>Sakhalin Island | M Li           | AA422-95  | NF   |
| <i>Sorbus sitchensis</i> M. Roem.                         | USA: Washington, King County                               | PF Zika        | 22792     | MO   |
| <i>Sorbus tauricola</i> Zaik.                             | Ukraine: Crimea, Jalta                                     | T Zaikonnikova | 7011      | MO   |
| <i>Sorbus thibetica</i> (Cardot) Hand.-<br>Mazz.          | China: Yunnan, Lijiang                                     | M Li           | SBB1187   | CDBI |
| <i>Sorbus thomsonii</i> (King ex Hook. fil.)<br>Rehder    | China: Sichuan, E'mei                                      | EH Wilson      | 4867      | MO   |
| <i>Sorbus tianschanica</i> Rupr.                          | China: Xinjiang, Urumchi                                   | ZM Zhu         | s.n.      | CDBI |
| <i>Sorbus torminalis</i> (L.) Crantz                      | France: Bourgogne-Franche-Comte,<br>Fontaine Francaise     | M Li           | AA246-98  | NF   |
| <i>Sorbus tsinlingensis</i> C. L. Tang                    | China: Shaanxi, Taibai                                     | M Li           | AA544-88  | NF   |
| <i>Sorbus umbellata</i> (Desf.) Fritsch                   | Greece: Crete, Nomos Rethimnis                             | NJ Turland     | 1583      | MO   |
| <i>Sorbus ursina</i> (Wall.) Decne.                       | Nepal: Bagmati, Rasuwa                                     | M Suzuki       | 8540111   | KATH |
| <i>Sorbus verrucosa</i> (Decne.) Rehder                   | Vietnam: Cao Bang, Nguyen Binh                             | PH Hoang       | 1272      | MO   |
| <i>Sorbus vilmorinii</i> C. K. Schneid.                   | China, Xizang, Markam                                      | M Li           | MK30789   | CDBI |
| <i>Sorbus yuana</i> Spongberg                             | China: Hubei, Shennongjia                                  | M Li           | AA1894-80 | NF   |
