# Supplementary material for: Pollen Morphology in Sorbus L. (Rosaceae) and Its Taxonomic Implications
Source: MDPI journal article supplement (doi:10.3390/plants12183318), 2023-09-20
Supplement: s1 [file s1]

|                                   |            |            |            |           |      |   |   |
|-----------------------------------|------------|------------|------------|-----------|------|---|---|
| <i>S. domestica</i>               | 37.61±2.58 | 20.26±1.63 | 31.94±1.18 | 1.86±0.18 | 0.85 | 4 | 5 |
| <b>4. Subg. <i>Micromeles</i></b> |            |            |            |           |      |   |   |
| <i>S. alnifolia</i>               | 41.73±2.91 | 22.20±1.22 | 35.63±1.18 | 1.88±0.22 | 0.85 | 4 | 1 |
| <i>S. caloneura</i>               | 25.97±3.52 | 15.35±1.93 | 22.73±1.87 | 1.69±0.14 | 0.88 | 4 | 2 |
| <i>S. corymbifera</i>             | 29.52±0.81 | 18.90±1.56 | 25.63±1.15 | 1.56±0.07 | 0.87 | 4 | 3 |
| <i>S. dunnii</i>                  | 25.39±4.11 | 19.00±4.01 | 20.95±1.37 | 1.34±0.11 | 0.83 | 4 | 3 |
| <i>S. folgneri</i>                | 22.89±1.91 | 26.48±1.95 | 14.71±0.88 | 0.86±0.07 | 0.64 | 1 | 3 |
| <i>S. japonica</i>                | 19.43±1.33 | 16.80±1.94 | 15.03±0.48 | 1.16±0.06 | 0.77 | 3 | 4 |
| <i>S. keissleri</i>               | 31.81±2.32 | 22.76±1.77 | 25.71±1.25 | 1.40±0.07 | 0.81 | 4 | 3 |
| <i>S. thomsonii</i>               | 19.75±1.79 | 16.86±4.13 | 16.68±0.94 | 1.17±0.07 | 0.84 | 3 | 2 |
| <i>S. tsinlingensis</i>           | 30.55±1.62 | 18.06±0.56 | 25.42±1.83 | 1.69±0.80 | 0.83 | 4 | 1 |
| <b>5. Subg. <i>Sorbus</i></b>     |            |            |            |           |      |   |   |
| <i>S. albopilosa</i>              | 18.16±1.09 | 11.58±0.87 | 15.87±1.52 | 1.57±0.13 | 0.87 | 4 | 1 |
| <i>S. amabilis</i>                | 26.45±2.72 | 15.49±2.68 | 22.77±2.85 | 1.78±0.12 | 0.86 | 4 | 1 |
| <i>S. americana</i>               | 42.73±2.94 | 20.49±1.81 | 38.91±1.56 | 2.09±0.14 | 0.91 | 5 | 1 |
| <i>S. amurensis</i>               | 30.47±3.34 | 18.03±1.73 | 28.29±2.31 | 1.69±0.11 | 0.93 | 4 | 1 |
| <i>S. aucuparia</i>               | 31.47±4.5  | 17.44±1.51 | 28.62±1.20 | 1.80±0.07 | 0.91 | 4 | 1 |
| <i>S. boissieri</i>               | 27.4±4.94  | 13.88±3.83 | 20.08±1.04 | 1.97±0.09 | 0.73 | 4 | 1 |
| <i>S. californica</i>             | 34.43±2.77 | 24.56±1.95 | 33.81±2.08 | 1.40±0.11 | 0.98 | 4 | 2 |
| <i>S. commixta</i>                | 36.50±1.47 | 19.25±1.87 | 33.72±1.95 | 1.90±0.06 | 0.92 | 4 | 5 |
| <i>S. decora</i>                  | 23.85±3.05 | 22.61±1.56 | 19.99±0.68 | 1.05±0.06 | 0.84 | 2 | 2 |
| <i>S. discolor</i>                | 20.15±1.5  | 13.65±2.11 | 15.78±0.82 | 1.48±0.17 | 0.78 | 4 | 4 |
| <i>S. esserteauiana</i>           | 32.79±1.24 | 16.37±0.94 | 29.16±2.15 | 2.00±0.13 | 0.89 | 5 | 5 |
| <i>S. filipes</i>                 | 29.7±2.04  | 27.59±1.68 | 26.03±2.36 | 1.08±0.12 | 0.88 | 2 | 1 |
| <i>S. glomerulata</i>             | 34.35±4.62 | 19.92±2.28 | 28.96±4.45 | 1.72±0.22 | 0.84 | 4 | 2 |
| <i>S. gracilis</i>                | 28.88±3.51 | 17.95±1.36 | 24.71±1.72 | 1.61±0.18 | 0.86 | 4 | 3 |

|                           |            |            |            |           |      |   |   |
|---------------------------|------------|------------|------------|-----------|------|---|---|
| <i>S. harrowiana</i>      | 27.08±4.51 | 18.03±1.93 | 24.24±1.66 | 1.50±0.11 | 0.90 | 4 | 3 |
| <i>S. helenae</i>         | 19.62±3.51 | 17.06±4.77 | 16.21±0.81 | 1.15±0.16 | 0.83 | 3 | 4 |
| <i>S. hupehensis</i>      | 29.17±2.2  | 14.45±1.67 | 25.09±1.23 | 2.02±0.03 | 0.86 | 5 | 1 |
| <i>S. insignis</i>        | 20.54±0.86 | 20.78±1.75 | 16.98±0.68 | 0.99±0.03 | 0.83 | 2 | 4 |
| <i>S. kiukiangensis</i>   | 23.54±0.01 | 22.66±2.82 | 23.00±0.66 | 1.04±0.14 | 0.98 | 2 | 2 |
| <i>S. koehneana</i>       | 39.18±2.46 | 24.59±2.28 | 34.47±2.39 | 1.59±0.83 | 0.88 | 4 | 2 |
| <i>S. kurzii</i>          | 18.15±1.9  | 20.74±2.24 | 16.61±1.44 | 0.88±0.05 | 0.91 | 1 | 3 |
| <i>S. matsumurana</i>     | 18.61±0.91 | 22.17±0.92 | 15.53±1.06 | 0.84±0.05 | 0.83 | 1 | 2 |
| <i>S. microphylla</i>     | 25.94±2.29 | 24.16±1.96 | 22.44±1.73 | 1.07±0.09 | 0.87 | 2 | 1 |
| <i>S. monbeigii</i>       | 30.94±1.76 | 21.13±1.91 | 27.49±1.28 | 1.46±0.14 | 0.89 | 4 | 2 |
| <i>S. multijuga</i>       | 34.86±2.78 | 17.11±1.26 | 30.93±3.30 | 2.04±0.15 | 0.89 | 5 | 2 |
| <i>S. obsoletidentata</i> | 29.57±5.37 | 17.67±1.82 | 27.96±5.42 | 1.67±0.13 | 0.82 | 4 | 2 |
| <i>S. oligodonta</i>      | 25.23±3.45 | 15.49±1.85 | 20.39±6.39 | 1.63±0.03 | 0.81 | 4 | 2 |
| <i>S. pohuashanensis</i>  | 32.02±3.18 | 17.09±2.26 | 29.07±2.43 | 1.87±0.17 | 0.91 | 4 | 1 |
| <i>S. poteriifolia</i>    | 22.88±1.26 | 21.84±0.46 | 18.78±2.18 | 1.05±0.06 | 0.82 | 2 | 2 |
| <i>S. prattii</i>         | 26.67±0.68 | 31.95±1.26 | 24.09±0.79 | 0.83±0.08 | 0.90 | 1 | 4 |
| <i>S. pteridophylla</i>   | 26.33±1.83 | 13.77±1.14 | 21.99±1.78 | 1.92±0.14 | 0.84 | 4 | 2 |
| <i>S. randaiensis</i>     | 35.38±3.16 | 17.16±1.67 | 30.55±4.95 | 2.07±0.22 | 0.86 | 5 | 1 |
| <i>S. reducta</i>         | 23.8±1.91  | 21.89±1.67 | 21.27±2.97 | 1.09±0.10 | 0.89 | 2 | 2 |
| <i>S. rehderiana</i>      | 32.06±2.43 | 17.07±1.42 | 27.91±2.49 | 1.88±0.18 | 0.87 | 4 | 1 |
| <i>S. rufo-ferruginea</i> | 32.81±2.39 | 19.08±1.72 | 29.77±3.23 | 1.72±0.13 | 0.91 | 4 | 1 |
| <i>S. rufopilosa</i>      | 29.33±1.48 | 15.06±1.01 | 25.45±1.80 | 1.96±0.18 | 0.87 | 4 | 2 |
| <i>S. sambucifolia</i>    | 27.07±2.17 | 22.11±2.32 | 23.33±1.42 | 1.22±0.06 | 0.86 | 3 | 5 |
| <i>S. sargentiana</i>     | 16.64±0.84 | 14.81±2.94 | 13.66±0.38 | 1.12±0.27 | 0.82 | 2 | 2 |
| <i>S. scalaris</i>        | 17.99±1.06 | 13.77±0.98 | 15.08±1.19 | 1.31±0.08 | 0.84 | 3 | 2 |
| <i>S. scopulina</i>       | 32.43±1.84 | 17.18±0.82 | 28.19±2.36 | 1.89±0.03 | 0.87 | 4 | 1 |

|                                   |            |                |            |            |      |   |   |
|-----------------------------------|------------|----------------|------------|------------|------|---|---|
| <i>S. setschwanensis</i>          | 26.96±1.50 | 16.55±0.25     | 23.10±1.16 | 1.61±0.08  | 0.86 | 4 | 1 |
| <i>S. sibirica</i>                | 31.43±2.51 | 18.16±1.33     | 27.65±1.93 | 1.73±0.12  | 0.88 | 4 | 5 |
| <i>S. sitchensis</i>              | 26.25±4.84 | 28.46±3.95     | 21.43±1.76 | 0.92±0.04  | 0.82 | 2 | 5 |
| <i>S. tapashana</i>               | 25.76±3.91 | 18.84±0.74     | 23.47±4.44 | 1.37±0.17  | 0.91 | 4 | 1 |
| <i>S. tianschanica</i>            | 25.8±1.63  | 18.42±1.93     | 20.49±0.47 | 1.40±0.07  | 0.79 | 4 | 4 |
| <i>S. ursina</i>                  | 21.31±4.77 | 18.46±2.66     | 16.86±0.75 | 1.15±0.07  | 0.79 | 3 | 3 |
| <i>S. vilmorinii</i>              | 28.46±3.63 | 21.88±2.03     | 23.49±1.25 | 1.30±0.016 | 0.83 | 3 | 4 |
| <i>S. wilsoniana</i>              | 18.37±1.08 | 15.09±0.79     | 15.62±1.61 | 1.22±0.08  | 0.85 | 3 | 1 |
| <i>S. zayuensis</i>               | 31.57±1.42 | 26.95±1.942.82 | 27.15±0.95 | 1.17±0.02  | 0.86 | 3 | 2 |
| <i>S. foliolosa</i>               | 25.06±1.43 | 26.09±1.21     | 19.03±1.18 | 0.96±0.27  | 0.76 | 2 | 2 |
| <b>6. Subg. <i>Torminaria</i></b> |            |                |            |            |      |   |   |
| <i>S. torminalis</i>              | 40.55±5.68 | 22.07±3.18     | 35.04±2.37 | 1.84±0.16  | 0.86 | 4 | 5 |
